# Supplementary material
Source: publisher site journal article supplement (https://www.dovepress.com/article/223632)

## **Appendix**

*Appendix 1: Baseline characteristics of the REVOLENS patients*

*Appendix 2: Correlation diagram between the EQ-5D and the SGRQ total score at baseline and 1 year*

*Appendix 3a: Correlation between the EQ-5D-5L and the SGRQ at 1 year in each group*

*Appendix 3b: Correlation diagram between the EQ-5D-5L and the SGRQ at 1 year in each group*

*Appendix 4: Bland Altman Plot of the EQ-5D and the SGRQ score at 1 year in each group*

At 1 year, the Lin's coefficient was 0.61 (0.45; 0.74) in the coil treatment group and 0.45 (0.28; 0.59) in the usual care group. The Bland Altman plots presented in Figure 4 showed significant points dispersion in both groups. The agreement limits were between -0.46 (-0.55; -0.38) and 0.24 (0.15; 0.33) in the coil treatment group and between -0.52 (-0.62; -0.43) and 0.21 (0.12; 0.31) in the usual care group. In addition there was a negative bias with a 95% confidence interval excluding zero of -0.11 (-0.16; -0.06) in the coil treatment group and -0.15 (-0.21; -0.10) in the usual care group, indicating that the EQ-5D score was smaller than the SGRQ score. The significant point's dispersion and the Lin's coefficient showed fair concordance between the 2 questionnaires.

*Appendix 5: Correlation diagram between the EQ-5D predicted value and the EQ-5D individual value at baseline and 1 year*

## Appendix

### Appendix 1: Baseline characteristics of the REVOLENS patients

|                                      | <b>Coil treatment<br/>(n=50)</b> | <b>Usual care<br/>(n=50)</b> |
|--------------------------------------|----------------------------------|------------------------------|
| Age, yr                              | 62.1 (8.3)                       | 61.9 (7.3)                   |
| Men, No. (%)                         | 39 (78)                          | 32 (64)                      |
| Pack-years smoked                    | 44 (19)                          | 46 (21)                      |
| Body mass index, kg/m <sup>2</sup>   | 22.5 (4.1)                       | 23 (4.3)                     |
| 6MWT distance, m                     | 300 (112) <sup>b</sup>           | 326 (121)                    |
| mMRC, No. (%) <sup>c</sup>           |                                  |                              |
| 1                                    | 0 (0)                            | 1(2) <sup>d</sup>            |
| 2                                    | 11 (22)                          | 13 (26)                      |
| 3                                    | 28 (56)                          | 25 (50)                      |
| 4                                    | 11 (22)                          | 11 (22)                      |
| Baseline Dyspnea Index <sup>e</sup>  | 4.4 (2.1)                        | 4.1 (1.9)                    |
| FEV <sub>1</sub> , % predicted       | 25.7 (7.5)                       | 27.4 (6.2)                   |
| FVC, % predicted                     | 67.4 (16.5)                      | 72 (20.1)                    |
| FEV <sub>1</sub> /FVC                | 0.31 (0.09)                      | 0.32 (0.08)                  |
| RV, % predicted                      | 271.2 (38.1)                     | 269.3 (44.3)                 |
| TLC, % predicted                     | 141.7 (16.6)                     | 143.6 (18)                   |
| RV/TLC                               | 0.70 (0.06)                      | 0.69 (0.07)                  |
| Emphysema (0-4) <sup>f</sup>         |                                  |                              |
| Right Upper lobe                     | 2.9 (0.7)                        | 3.2 (0.8)                    |
| Middle lobe                          | 2.1 (1)                          | 2.3 (0.8)                    |
| Right Lower lobe                     | 2.2 (0.9)                        | 2.2 (0.8)                    |
| Left Upper Lobe                      | 2.9 (0.8)                        | 3 (0.7)                      |
| Left Lower Lobe                      | 2.3 (0.9)                        | 2.2 (1)                      |
| Heterogeneous <sup>g</sup> , No. (%) | 17 (34)                          | 16 (32)                      |
| Treatments, No. (%)                  |                                  |                              |
| Oxygen therapy                       | 32 (64)                          | 29 (58)                      |
| Long-action beta-agonists            | 49 (98)                          | 48 (96)                      |
| Long-acting muscarinic antagonists   | 45 (90)                          | 42 (84)                      |
| Inhaled corticosteroids              | 46 (92)                          | 43 (86)                      |

<sup>a</sup> Values are shown as mean (Standard Deviation), or number (No.) and percentage (%) when indicated.

<sup>b</sup>The 6-minute walk test was conducted with one patient receiving oxygen by mistake, and the patient was retained for further follow-up and included in analyses.

<sup>c</sup>The modified Medical Research Council (mMRC) scale grades 5 different levels of dyspnea based on the circumstances in which it arises: Grade 0 “I only get breathless with strenuous exercise”; Grade 1 “I get short of breath when hurrying on level ground or walking up a slight hill”; Grade 2 “On level ground, I

walk slower than people of the same age because of breathlessness, or I have to stop for breath when walking at my own pace on the level”; Grade 3 “I stop for breath after walking about 100 yards or after a few minutes on level ground”; Grade 4 “I am too breathless to leave the house or I am breathless when dressing”

<sup>d</sup>1 patient was included in error with a mMRC at 1, but was included in the follow-up and analyses.

<sup>e</sup>Baseline Dyspnea Index uses five grades (0 to 4) for 3 categories, functional impairment, magnitude of task and magnitude of effort with a total score from 0 to 12.

<sup>f</sup>A visual score from 0 to 4 was assigned to each lobe, based on the extent of tissue destruction, where 0= no emphysema, 1= 1 to 25% emphysematous, 2= 26 to 50%, 3= 51 to 75%, and 4= >75%.

<sup>g</sup>Emphysema was classified as heterogeneous in there was a difference >1 point between ipsilateral lobes.

NOTES: mMRC=modified Medical Research Council test; FEV<sub>1</sub>=forced expiratory volume in one second; FVC=forced vital capacity; FEV<sub>1</sub>/FVC= forced expiratory volume in one second/forced vital capacity; RV=residual volume; TLC=total lung capacity; RV/TLC=residual volume/total lung capacity; SGRQ=St. George’s Respiratory Questionnaire.

*Appendix 2: Correlation diagram between the EQ-5D and the SGRQ total score at baseline and 1 year*

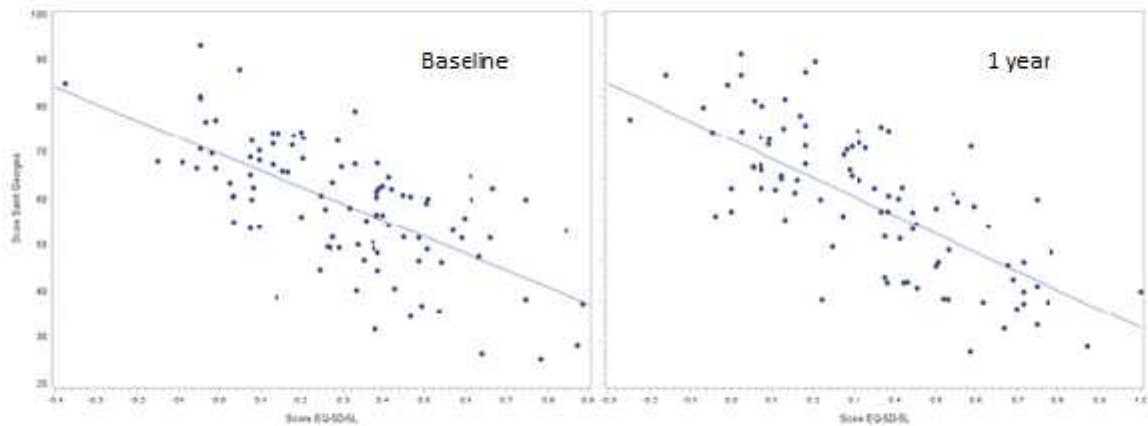

*Appendix 3a: Correlation between the EQ-5D-5L and the SGRQ at 1 year in each group*

|                             |                 | Mean (95%CI)       | Correlative with the EQ-5D-5L |         |
|-----------------------------|-----------------|--------------------|-------------------------------|---------|
|                             |                 |                    | Correlation coefficient       | P value |
| <b>Coil treatment group</b> | <b>SGRQ (%)</b> | 52.0 (46.9 ; 57.2) | -0.740                        | <0.0001 |
|                             | Symptoms domain | 53.1 (47.4 ; 58.7) | -0.516                        | 0.0001  |
|                             | Activity domain | 72.7 (67.6 ; 77.9) | -0.658                        | <0.0001 |
|                             | Impact domain   | 39.0 (33.2 ; 44.7) | -0.739                        | <0.0001 |
|                             | <b>EQ-5D-5L</b> | 0.37 (0.29 ; 0.44) |                               |         |
| <b>Usual care group</b>     | <b>SGRQ (%)</b> | 57.6 (53.3 ; 61.9) | -0.647                        | <0.0001 |
|                             | Symptoms domain | 51.5 (46.1 ; 57.0) | -0.469                        | 0.0006  |
|                             | Activity domain | 80.5 (76.6 ; 84.4) | -0.735                        | <0.0001 |
|                             | Impact domain   | 45.8 (40.4 ; 51.2) | -0.525                        | <0.0001 |
|                             | <b>EQ-5D-5L</b> | 0.27 (0.20 ; 0.34) |                               |         |

*Appendix 3b: Correlation diagram between the EQ-5D-5L and the SGRQ at 1 year in each group*

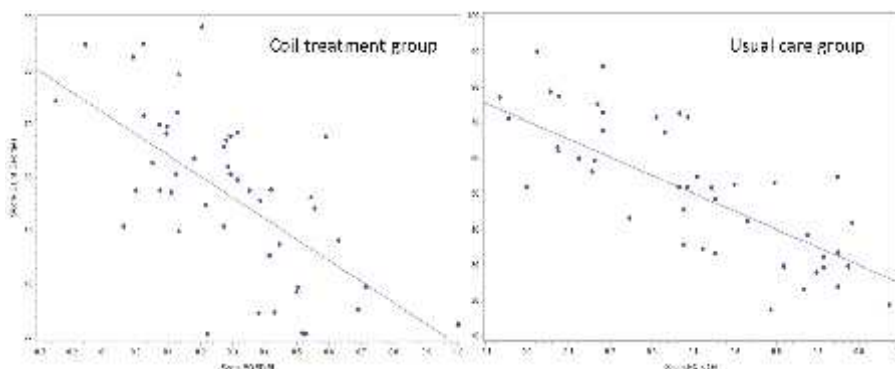

*Appendix 4: Bland Altman Plot of the EQ-5D and the SGRQ score at 1 year in each group*

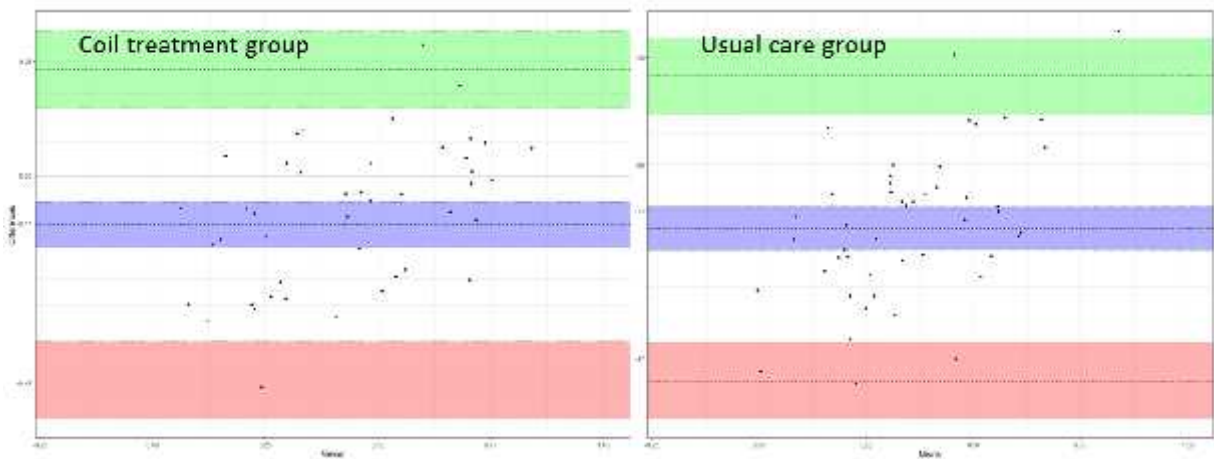

At 1 year, the Lin's coefficient was 0.61 (0.45; 0.74) in the coil treatment group and 0.45 (0.28; 0.59) in the usual care group. The Bland Altman plots presented in Figure 4 showed significant points dispersion in both groups. The agreement limits were between -0.46 (-0.55; -0.38) and 0.24 (0.15; 0.33) in the coil treatment group and between -0.52 (-0.62; -0.43) and 0.21 (0.12; 0.31) in the usual care group. In addition there was a negative bias with a 95% confidence interval excluding zero of -0.11 (-0.16; -0.06) in the coil treatment group and -0.15 (-0.21; -0.10) in the usual care group, indicating that the EQ-5D score was smaller than the SGRQ score. The significant point's dispersion and the Lin's coefficient showed fair concordance between the 2 questionnaires.

*Appendix 5: Correlation diagram between the EQ-5D predicted value and the EQ-5D individual value at baseline and 1 year*

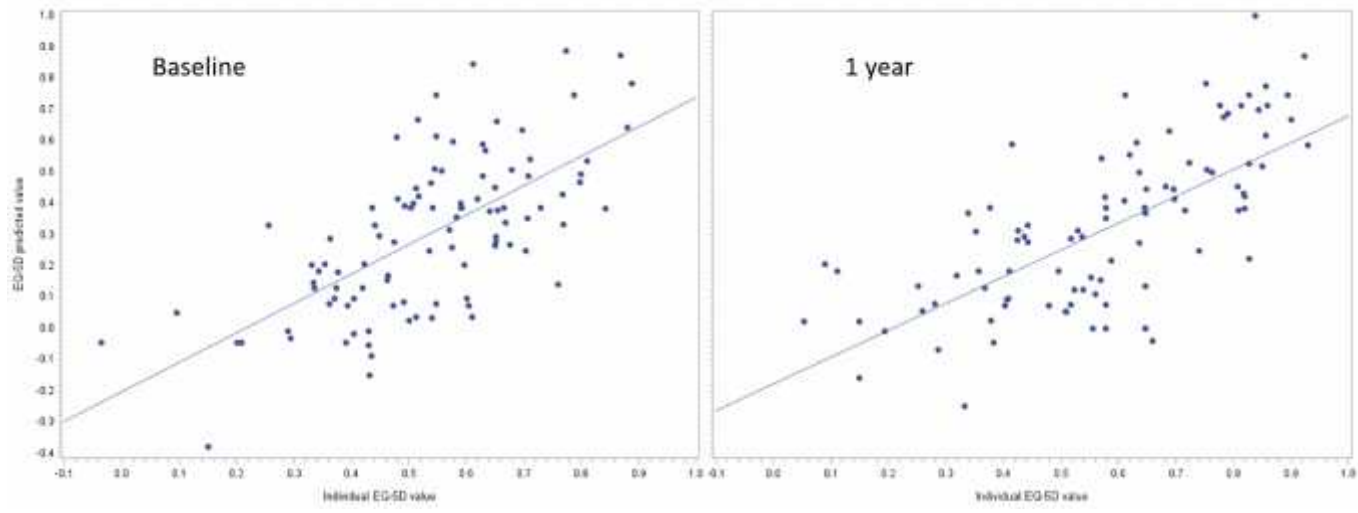

Supplement: Supplementary file 1 [file get_supplementary_file.php]
